# Supplementary material
Source: Springer Nature journal article supplement (https://www.springermedizin.de/resource/supplementary/12990_2010_327_MOESM3_ESM.pdf/9613040)

**A**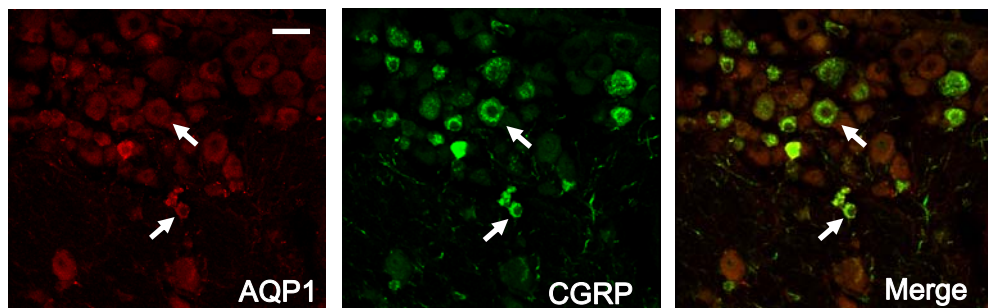**B**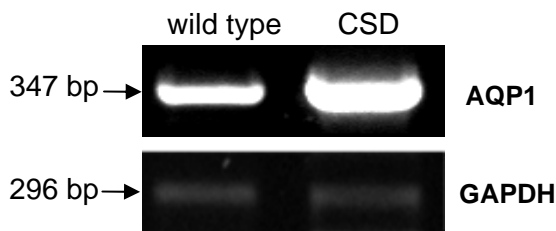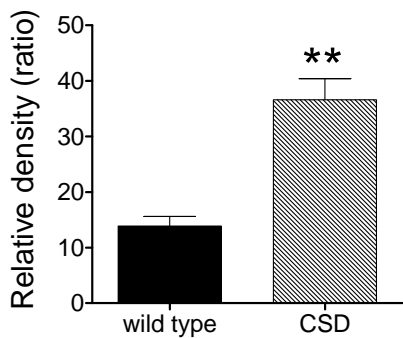**C**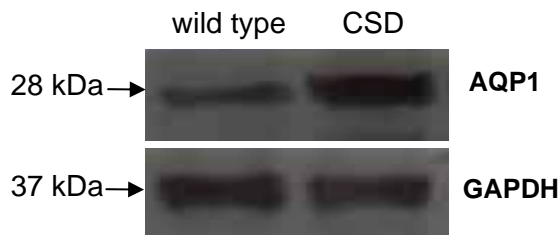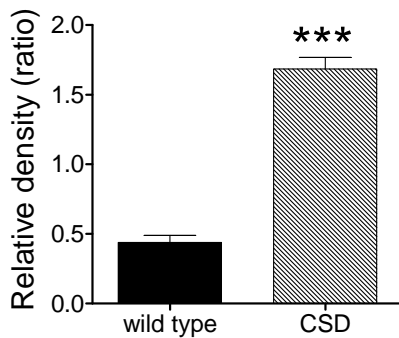

Supplement: MOESM3 [file 9613040]
